# Supplementary material for: Estimating the returns to United Kingdom publicly funded musculoskeletal disease research in terms of net value of improved health outcomes
Source: Health Res Policy Syst. 2018 Jan 10;16:1. doi: 10.1186/s12961-017-0276-7 (PMC5761203; doi:10.1186/s12961-017-0276-7)
Supplement: Supplementary file 2 — Health gain (i.e. net monetary benefit) data. (XLSX 61 kb) [file 12961_2017_276_MOESM2_ESM.xlsx]

## Sheet: Table A2.1 Intervention summary
Table A2.1 - Summary of Interventions by condition
	Intervention (by condition)	Historical comparator	Notes on population numbers
Rheumatoid Arthritis	Early and aggressive combination therapy	DMARD step-up regimen	Numbers represent patients starting treatment in any given year
	Biologic DMARDS for severe RA, not previously treated or having failed cDMARDS	Conventional DMARD therapy	Numbers represent patients starting treatment in any given year
	Biologic DMARDS for severe RA, following failure of DMARDs inc anti-TNF	Conventional DMARD therapy	Numbers represent patients starting treatment in any given year
Juvenile Idiopathic Arthritis	Early and aggressive combination therapy	DMARD step-up regimen	Numbers represent patients starting treatment in any given year
	Biologic DMARDS for severe RA, not previously treated or having failed cDMARDS	Conventional DMARD therapy	Numbers represent patients starting treatment in any given year
	Biologic DMARDS for severe RA, following failure of DMARDs inc anti-TNF	Conventional DMARD therapy	Numbers represent patients starting treatment in any given year
Psoriatic Arthritis	Early and aggressive combination therapy	DMARD step-up regimen	Numbers represent patients starting treatment in any given year
	Biologic DMARDS for severe RA, not previously treated or having failed cDMARDS	Conventional DMARD therapy	Numbers represent patients starting treatment in any given year
Ankylosing Spondylitis	Biologic DMARDS for severe RA, not previously treated or having failed cDMARDS	Conventional therapy (NSAIDs, physical therapies)	Numbers represent patients starting treatment in any given year
Gout	Allopurinol	No therapy	Numbers represent patients starting treatment in any given year
	Febuxostat	No therapy	Numbers represent patients starting treatment in any given year
Osteoarthritis	Cementless protheses	Cemented protheses	Numbers represent patients undergoing procedure in any given year
	Hybrid protheses	Cemented protheses	Numbers represent patients undergoing procedure in any given year
	Knee mini-incision	Standard incision	Numbers represent patients undergoing procedure in any given year
	Hip mini-incision	Standard incision	Numbers represent patients undergoing procedure in any given year
	Cox-II inhibitors	Diclofenac	Numbers represent patients cocomitant use of PPI in any given year
	Proton pump inhibitors (PPI)	Cox-II inhibitors alone	Numbers represent patients starting a 6-month course in any given year
	Hip replacement length of stay	Length of stay in 1999	Numbers represent total number of surgical hospital stay days reduced for procedures in any given year compared to baseline
	Knee replacement length of stay	Length of stay in 1999	Numbers represent total number of surgical hospital stay days reduced for procedures in any given year compared to baseline
Low Back Pain	Structured exercise programmes	Active management	Numbers represent patients undergoing therapy in any given year
	Manual therapy	Active management	Numbers represent patients undergoing therapy in any given year
	Combined physical and psychological therapy	Active management	Numbers represent patients undergoing therapy in any given year
Systemic lupus erythematosus	Mycophenolate mofetil	Cyclophosphamide	Numbers represent patients starting treatment in any given year
Osteoporosis	Biphosphonates	No treatment (patient Vitamin D and Calcium replete)	Numbers represent patients starting treatment in any given year
	Other bone density acting agents (strontium ranelate, teriparatide denosumab)	No treatment (patient Vitamin D and Calcium replete)	Numbers represent patients starting treatment in any given year

## Sheet: Table A2.2 RA, JIA, AS,PsA,Gout
Table A2.2 - Rheumatoid Arthritis, Juvenile Idiopathic Arthritis, Psoriatic Arthritis, and Gout
Rheumatoid Arthritis		Population numbers (UK)																						Rheumatoid Arthritis		Net Monetary Benefit (UK)
Interventions		1994	1995	1996	1997	1998	1999	2000	2001	2002	2003	2004	2005	2006	2007	2008	2009	2010	2011	2012	2013			Interventions		1994	1995	1996	1997	1998	1999	2000	2001	2002	2003	2004	2005	2006	2007	2008	2009	2010	2011	2012	2013
RA management - early & aggressive combination therapy		342.399	578.751	875.258	1231.81	1648.33	2124.06	2852.02	3684.31	4319.49	4984.98	5407.63	5017.49	5451.61	6062.54	7756.81	9296.16	10803.1	14783	16631	15988.3			RA management - early & aggressive combination therapy		1.55079e+07	2.62126e+07	3.9642e+07	5.5791e+07	7.46557e+07	9.62024e+07	1.29173e+08	1.66869e+08	1.95637e+08	2.25778e+08	2.44921e+08	2.27251e+08	2.46913e+08	2.74583e+08	3.51319e+08	4.21039e+08	4.89289e+08	6.69547e+08	7.53246e+08	7.2414e+08
bDMARD for severe RA not previously treated or having failed DMARDs	Infliximab	0	0	0	0	0	279.884	279.703	279.552	279.45	279.341	359.904	401.099	502.841	613.599	769.475	901.448	1031.08	1106.48	1211.34	1367.9			bDMARD for severe RA not previously treated or having failed DMARDs		0	0	0	0	0	-5.89e+06	-5.88618e+06	-8.60346e+06	-7.75667e+06	-1.11872e+07	-3.05532e+07	-3.32615e+07	-2.46671e+07	-5.68755e+07	-6.14822e+07	-7.68207e+07	-9.2235e+07	-1.21042e+08	-1.39397e+08	-1.38982e+08
	Etanercept	0	0	0	0	0	0	0	129.272	89.1364	252.26	671.353	340.981	460.274	1114.38	1368.38	1496.32	1586.52	1829.61	1819.15	1854.31			bDMARD for severe RA following fialure of DMARD inc anti-TNF inhibitor	Infliximab	0	0	0	0	0	-52159.9	-52126.2	-52098	-52078.9	-52058.7	-67072.6	-74749.7	-93710.7	-114352	-143401	-167996	-192154	-206206	-225747	-254926
	Adalimumab	0	0	0	0	0	0	0	0	0	0	420.585	838.46	209.03	974.668	757.441	1163.53	1394.77	1663	1955.67	2198.67				Etanercept	0	0	0	0	0	0	0	-424569	-292751	-828499	-2.20493e+06	-1.11988e+06	-1.51168e+06	-3.65995e+06	-4.49416e+06	-4.91437e+06	-5.21063e+06	-6.00899e+06	-5.97465e+06	-6.09011e+06
	Abatacept	0	0	0	0	0	0	0	0	0	0	0	0	0	0	26.2538	26.2466	26.2327	80.2831	54.3258	129.21				Adalimumab	0	0	0	0	0	0	0	0	0	0	-879458	-1.75325e+06	-437089	-2.03806e+06	-1.58383e+06	-2.43299e+06	-2.9165e+06	-3.47738e+06	-4.08937e+06	-4.5975e+06
	Tocilizumab	0	0	0	0	0	0	0	0	0	0	0	0	0	0	0	62.86	62.8268	367.966	467.391	278.977				Rituximab	0	0	0	0	0	0	0	0	0	0	0	0	4.39672e+06	944337	1.21262e+06	1.19913e+06	1.82773e+06	2.07593e+06	2.37283e+06	2.59179e+06
	Certolizumab	0	0	0	0	0	0	0	0	0	0	0	0	0	0	0	0	241.384	634.874	487.491	258.814				Abatacept	0	0	0	0	0	0	0	0	0	0	0	0	0	0	-25735.3	-25728.1	-25714.5	-78697.3	-53252.7	-126658
	Golimumab	0	0	0	0	0	0	0	0	0	0	0	0	0	0	0	0	40.0656	69.5559	628.6	516.352				Tocilizumab	0	0	0	0	0	0	0	0	0	0	0	0	0	0	0	23907	23894.4	139946	177759	106101
bDMARD for severe RA following fialure of DMARD inc anti-TNF inhibitor	Infliximab	0	0	0	0	0	5.02581	5.02256	5.01985	5.01801	5.01606	6.46271	7.20243	9.02939	11.0182	13.8173	16.1871	18.5148	19.8688	21.7517	24.5631				Golimumab	0	0	0	0	0	0	0	0	0	0	0	0	0	0	0	0	-38882.8	-67502.4	-610042	-501107
	Etanercept	0	0	0	0	0	0	0	33.294	22.957	64.9694	172.906	87.8193	118.543	287.007	352.424	385.376	408.608	471.214	468.521	477.576				Total	1.55079e+07	2.62126e+07	3.9642e+07	5.5791e+07	7.46557e+07	9.02603e+07	1.23235e+08	1.57789e+08	1.87536e+08	2.13711e+08	2.11216e+08	1.91042e+08	2.246e+08	2.1284e+08	2.84803e+08	3.379e+08	3.90522e+08	5.40882e+08	6.05446e+08	5.76285e+08
	Adalimumab	0	0	0	0	0	0	0	0	0	0	86.535	172.512	43.0077	200.537	155.843	239.396	286.972	342.16	402.377	452.375
	Rituximab	0	0	0	0	0	0	0	0	0	0	0	0	3692.06	792.99	1018.28	1006.95	1534.8	1743.23	1992.54	2176.41
	Abatacept	0	0	0	0	0	0	0	0	0	0	0	0	0	0	1.22634	1.226	1.22535	3.75009	2.53761	6.03551
	Tocilizumab	0	0	0	0	0	0	0	0	0	0	0	0	0	0	0	9.99457	9.9893	58.5056	74.3139	44.3566
	Golimumab	0	0	0	0	0	0	0	0	0	0	0	0	0	0	0	0	18.5447	32.1945	290.952	238.997
Juvenile Idiopathic Arthritis		Population numbers (UK)																						Juvenile Idiopathic Arthritis		Net Monetary Benefit (UK)
Interventions		1994	1995	1996	1997	1998	1999	2000	2001	2002	2003	2004	2005	2006	2007	2008	2009	2010	2011	2012	2013			Interventions		1994	1995	1996	1997	1998	1999	2000	2001	2002	2003	2004	2005	2006	2007	2008	2009	2010	2011	2012	2013
RA management - early & aggressive combination therapy		100.352	169.622	256.524	361.024	483.098	622.527	835.88	1079.81	1265.97	1461.01	1584.88	1470.54	1597.78	1776.83	2273.39	2724.55	3166.19	4332.64	4874.26	4685.91			RA management - early & aggressive combination therapy		4.54509e+06	7.68248e+06	1.16184e+07	1.63514e+07	2.18803e+07	2.81953e+07	3.78584e+07	4.89065e+07	5.7338e+07	6.61719e+07	7.17822e+07	6.66034e+07	7.23661e+07	8.04757e+07	1.02966e+08	1.23399e+08	1.43402e+08	1.96233e+08	2.20764e+08	2.12233e+08
bDMARD for severe JIA not previously treated or having failed DMARDs	Etanercept - 1st line	0	0	0	0	0	0	0	40.6415	28.0234	79.3074	211.065	107.2	144.704	350.346	430.2	470.424	498.783	575.206	571.918	582.971			bDMARD for severe JIA not previously treated or having failed DMARDs	Etanercept - 1st line	0	0	0	0	0	0	0	-617426	-425731	-1.20484e+06	-3.2065e+06	-1.62858e+06	-2.19835e+06	-5.32245e+06	-6.5356e+06	-7.14668e+06	-7.57751e+06	-8.73853e+06	-8.68858e+06	-8.85649e+06
	Tocilizumab - 1st line	0	0	0	0	0	0	0	0	0	0	0	0	0	0	0	18.6374	18.6276	109.098	138.577	82.7141				Tocilizumab - 1st line	0	0	0	0	0	0	0	0	0	0	0	0	0	0	0	-537763	-537479	-3.14793e+06	-3.9985e+06	-2.38663e+06
	Adalimumab - 2nd line	0	0	0	0	0	0	0	0	0	0	126.78	252.743	63.0094	293.801	228.321	350.732	420.435	501.289	589.511	662.762				Adalimumab - 2nd line	0	0	0	0	0	0	0	0	0	0	-4.29189e+06	-8.55611e+06	-2.13306e+06	-9.94605e+06	-7.72935e+06	-1.18733e+07	-1.4233e+07	-1.69702e+07	-1.99567e+07	-2.24365e+07
	Abatacept - 2nd line	0	0	0	0	0	0	0	0	0	0	0	0	0	0	6.92204	6.92012	6.91647	21.1673	14.3234	34.0672				Abatacept - 2nd line	0	0	0	0	0	0	0	0	0	0	0	0	0	0	-346794	-346698	-346515	-1.06048e+06	-717604	-1.70677e+06
																									Total	4.54509e+06	7.68248e+06	1.16184e+07	1.63514e+07	2.18803e+07	2.81953e+07	3.78584e+07	4.8289e+07	5.69123e+07	6.4967e+07	6.42838e+07	5.64187e+07	6.80346e+07	6.52072e+07	8.8354e+07	1.03495e+08	1.20708e+08	1.66316e+08	1.87402e+08	1.76847e+08
Psoriatic Arthritis		Population numbers (UK)																						Psoriatic Arthritis		Net Monetary Benefit (UK)
Interventions		1994	1995	1996	1997	1998	1999	2000	2001	2002	2003	2004	2005	2006	2007	2008	2009	2010	2011	2012	2013			Interventions		1994	1995	1996	1997	1998	1999	2000	2001	2002	2003	2004	2005	2006	2007	2008	2009	2010	2011	2012	2013
RA management - early & aggressive combination therapy		32.7751	55.3991	83.7814	117.912	157.781	203.319	273.001	352.669	413.47	477.172	517.628	480.284	521.839	580.318	742.496	889.846	1034.09	1415.06	1591.95	1530.43			RA management - early & aggressive combination therapy		1.48444e+06	2.50912e+06	3.7946e+06	5.34042e+06	7.14618e+06	9.20868e+06	1.23647e+07	1.5973e+07	1.87268e+07	2.16119e+07	2.34443e+07	2.17529e+07	2.3635e+07	2.62836e+07	3.3629e+07	4.03027e+07	4.68357e+07	6.40903e+07	7.21022e+07	6.9316e+07
bDMARD for severe RA not previously treated or having failed DMARDs	Infliximab	0	0	0	0	0	49.8593	49.827	49.8001	49.7818	49.7625	53.4285	59.5439	74.6477	91.09	114.23	133.822	153.066	164.259	179.825	203.068			bDMARD for severe RA not previously treated or having failed DMARDs	Infliximab	0	0	0	0	0	-372454	-372213	-372012	-371876	-371731	-399117	-444799	-557627	-680452	-853311	-999663	-1.14342e+06	-1.22703e+06	-1.34331e+06	-1.51694e+06
	Etanercept	0	0	0	0	0	0	0	28.4491	19.6164	55.5152	147.745	124.035	84.4109	204.368	250.95	274.414	290.957	335.537	333.619	340.066				Etanercept	0	0	0	0	0	0	0	10888.6	7508	21248	56548.3	47473.2	32307.6	78220.3	96049.1	105030	111361	128424	127690	130158
	Adalimumab	0	0	0	0	0	0	0	0	0	0	88.7461	176.92	44.1066	205.661	283.937	204.594	245.253	292.419	343.882	386.611				Adalimumab	0	0	0	0	0	0	0	0	0	0	-119211	-237653	-59247.4	-276260	-381406	-274826	-329443	-392800	-461928	-519326
	Golimumab	0	0	0	0	0	0	0	0	0	0	0	0	0	0	0	0	10.0164	27.4009	30.7556	313.499				Golimumab	0	0	0	0	0	0	0	0	0	0	0	0	0	0	0	0	-28540.5	-78075.5	-87634.2	-893278
																									Total	1.48444e+06	2.50912e+06	3.7946e+06	5.34042e+06	7.14618e+06	8.83622e+06	1.19925e+07	1.56119e+07	1.83624e+07	2.12615e+07	2.29825e+07	2.11179e+07	2.30504e+07	2.54051e+07	3.24903e+07	3.91332e+07	4.54456e+07	6.25208e+07	7.0337e+07	6.65166e+07
Ankylosing Spondylitis		Population numbers (UK)																						Ankylosing Spondylitis		Net Monetary Benefit (UK)
Interventions		1994	1995	1996	1997	1998	1999	2000	2001	2002	2003	2004	2005	2006	2007	2008	2009	2010	2011	2012	2013			Interventions		1994	1995	1996	1997	1998	1999	2000	2001	2002	2003	2004	2005	2006	2007	2008	2009	2010	2011	2012	2013
bDMARD for severe RA not previously treated or having failed DMARDs	Infliximab	0	0	0	0	0	35.6138	35.5907	35.5715	35.5584	35.5446	45.7959	51.0376	63.9838	78.0772	97.9115	114.704	131.199	140.793	154.136	174.058			bDMARD for severe RA not previously treated or having failed DMARDs	Infliximab	0	0	0	0	0	-524125	-523785	-523503	-523311	-523107	-673974	-751117	-941644	-1.14906e+06	-1.44096e+06	-1.68809e+06	-1.93085e+06	-2.07205e+06	-2.2684e+06	-2.5616e+06
	Etanercept	0	0	0	0	0	0	0	20.3208	14.0117	39.6537	105.532	53.6	72.3522	175.173	215.1	235.212	249.392	287.603	285.959	291.485				Etanercept	0	0	0	0	0	0	0	59344	40919.2	115803	308193	156531	211295	511568	628171	686905	728314	839905	835105	851244
	Adalimumab	0	0	0	0	0	0	0	0	0	0	63.39	126.372	31.5047	146.901	114.16	175.366	210.217	250.645	294.756	331.381				Adalimumab	0	0	0	0	0	0	0	0	0	0	209030	416713	103887	484408	376446	578273	693195	826505	971962	1.09273e+06
	Certolizumab	0	0	0	0	0	0	0	0	0	0	0	0	0	0	0	0	30.1729	79.3593	34.077	40.5249				Certolizumab	0	0	0	0	0	0	0	0	0	0	0	0	0	0	0	0	44518.6	117090	50278.9	59792.3
	Golimumab	0	0	0	0	0	0	0	0	0	0	0	0	0	0	0	0	7.15457	12.4207	112.25	92.2056				Golimumab	0	0	0	0	0	0	0	0	0	0	0	0	0	0	0	0	24200	42012.5	379680	311881
																									Total	0	0	0	0	0	-524125	-523785	-464159	-482392	-407304	-156751	-177873	-626462	-153079	-436339	-422916	-440617	-246533	-31378.9	-245951
Gout		Population numbers (UK)																						Gout		Net Monetary Benefit (UK)
	Interventions	1994	1995	1996	1997	1998	1999	2000	2001	2002	2003	2004	2005	2006	2007	2008	2009	2010	2011	2012	2013				Interventions	1994	1995	1996	1997	1998	1999	2000	2001	2002	2003	2004	2005	2006	2007	2008	2009	2010	2011	2012	2013
	Allopurinol	13637.3	13716.8	13796.2	13875.2	13953.8	14027.8	14721.2	15237.9	15990.8	16828.7	17695.8	15633.7	15331.2	17028.9	20175.1	19882	20063.6	20526.2	21672.6	22972.8				Allopurinol	2.19376e+07	2.20655e+07	2.21933e+07	2.23202e+07	2.24467e+07	2.25658e+07	2.36812e+07	2.45124e+07	2.57235e+07	2.70713e+07	2.84662e+07	2.51491e+07	2.46624e+07	2.73935e+07	3.24547e+07	3.19831e+07	3.22753e+07	3.30193e+07	3.48635e+07	3.69551e+07
	Febuxostat	0	0	0	0	0	0	0	0	0	0	0	0	0	0	0	0	722.808	1868.79	1889.32	2974.13				Febuxostat	0	0	0	0	0	0	0	0	0	0	0	0	0	0	0	0	2.27167e+06	5.87332e+06	5.93784e+06	9.34723e+06
																									Total	2.19376e+07	2.20655e+07	2.21933e+07	2.23202e+07	2.24467e+07	2.25658e+07	2.36812e+07	2.45124e+07	2.57235e+07	2.70713e+07	2.84662e+07	2.51491e+07	2.46624e+07	2.73935e+07	3.24547e+07	3.19831e+07	3.45469e+07	3.88927e+07	4.08013e+07	4.63024e+07

## Sheet:  Table A2.3 Osteoarthritis
Table A2.3 Osteoarthritis
Osteoarthritis		Population numbers (UK)
Intervention		1994	1995	1996	1997	1998	1999	2000	2001	2002	2003	2004	2005	2006	2007	2008	2009	2010	2011	2012	2013
Total hip replacement protheses	Cementless	3062.34	3674.99	4331.26	5030.96	5774.04	6558.43	7202.68	8077.72	9384.29	10812.7	13329.9	17682.2	21813.1	27157.8	29472.6	31152.5	34335.2	35442.3	35904.4	37057.9
	Hybrid	4812.26	5053.11	5293.76	5534.05	5774.04	6011.89	6094.57	6346.78	6881.81	7433.76	9409.33	10609.3	10787.6	11985.7	12503.5	12461	13897.6	16424.5	17952.2	20229.3
Hip and knee replacment surgical technique	Knee mini-incision	0	0	0	0	0	0	0	0	0	3674.85	4089.38	4682.27	5206.54	6578.73	6306.6	6675.6	6508.71	5836.77	5764.99	5761.18
	Hip mini-incision	0	0	0	0	0	0	0	0	0	2560.94	4462.31	4370.11	4476.9	4980.38	4385.02	3546.46	3814.55	4047.12	3988.15	4067.85
Cox-II inhibitors	Etodolac	11549.5	13470.8	15865.9	17699	19224.1	23029.4	23175.7	23776.3	27801.9	28653	29515.1	44591.9	48118.5	44730.5	40482.8	36065.6	32453.9	28543	24529.4	21907.2
	Meloxicam	0	0	71432	142803	214109	255449	270145	271697	291030	285405	286621	362968	353445	324793	289331	265747	291908	222110	198990	163701
	Celecoxib	0	0	0	0	0	0	24447.6	161222	333102	477966	614024	199899	145799	136634	130055	125066	118858	109013	95838.9	87633.2
	Etoricoxib	0	0	0	0	0	0	0	0	14900	70940.5	131486	90544.3	81778.4	86736.8	97627.7	93340.2	92554.7	86202.3	77651.1	73860.7
Cocomitant use of Proton Pump Inhibitors	Etodolac	0	0	0	0	0	0	0	0	0	0	0	0	0	2236.53	4048.28	3606.56	3245.39	2854.3	2452.94	2190.72
	Meloxicam	0	0	0	0	0	0	0	0	0	0	0	0	0	16239.6	28933.1	26574.7	29190.8	22211	19899	16370.1
	Celecoxib	0	0	0	0	0	0	0	0	0	0	0	0	0	6831.69	13005.5	12506.6	11885.8	10901.3	9583.89	8763.32
	Etoricoxib	0	0	0	0	0	0	0	0	0	0	0	0	0	4336.84	9762.77	9334.02	9255.47	8620.23	7765.11	7386.07
Reduced length of stay (Total days compared to 1999 LOS)	Knee replacement	0	0	0	0	0	0	20707.5	51459.3	98537.8	163870	226273	278241	347154	460658	504893	525299	575200	638806	649194	670126
	Hip replacement	0	0	0	0	0	0	23504.1	41866.4	80411.7	139525	181673	240283	277893	351814	403838	415795	489061	560172	573480	612389
Osteoarthritis		Net Monetary Benefit (UK)
Intervention		1994	1995	1996	1997	1998	1999	2000	2001	2002	2003	2004	2005	2006	2007	2008	2009	2010	2011	2012	2013
Total hip replacement protheses	Cementless	1.12475e+07	1.34976e+07	1.5908e+07	1.84778e+07	2.1207e+07	2.4088e+07	2.64542e+07	2.9668e+07	3.44668e+07	3.97133e+07	4.89583e+07	6.49437e+07	8.01158e+07	9.97459e+07	1.08248e+08	1.14418e+08	1.26107e+08	1.30173e+08	1.31871e+08	1.36107e+08
	Hybrid	3.26819e+07	3.43177e+07	3.5952e+07	3.7584e+07	3.92138e+07	4.08291e+07	4.13907e+07	3.9726e+07	4.44082e+07	4.38948e+07	4.63621e+07	6.31435e+07	6.12372e+07	5.22843e+07	4.9165e+07	4.55334e+07	5.2933e+07	6.37431e+07	7.43918e+07	8.89377e+07
Hip and knee replacment surgical technique	Knee mini-incision	0	0	0	0	0	0	0	0	0	1.92527e+06	3.35469e+06	3.28538e+06	3.36566e+06	3.74417e+06	3.29658e+06	2.66617e+06	2.86772e+06	3.04256e+06	2.99822e+06	3.05814e+06
	Hip mini-incision	0	0	0	0	0	0	0	0	0	2.76269e+06	3.07432e+06	3.52006e+06	3.91419e+06	4.94578e+06	4.7412e+06	5.01861e+06	4.89314e+06	4.38798e+06	4.33402e+06	4.33116e+06
Cox-II inhibitors	Etodolac	1.11825e+06	1.30428e+06	1.53617e+06	1.71366e+06	1.86132e+06	2.22976e+06	2.24393e+06	2.30208e+06	2.69185e+06	2.77425e+06	2.85772e+06	4.3175e+06	4.65895e+06	4.33092e+06	3.91964e+06	3.49196e+06	3.14226e+06	2.76361e+06	2.375e+06	2.12111e+06
	Meloxicam	0	0	6.91622e+06	1.38265e+07	2.07306e+07	2.47332e+07	2.61561e+07	2.63064e+07	2.81782e+07	2.76336e+07	2.77513e+07	3.51434e+07	3.42214e+07	3.14472e+07	2.80138e+07	2.57303e+07	2.82633e+07	2.15052e+07	1.92667e+07	1.585e+07
	Celecoxib	0	0	0	0	0	0	5.13523e+06	3.38647e+07	6.99681e+07	1.00397e+08	1.28976e+08	4.19889e+07	3.0625e+07	2.86999e+07	2.7318e+07	2.62702e+07	2.49661e+07	2.28982e+07	2.0131e+07	1.84074e+07
	Etoricoxib	0	0	0	0	0	0	0	0	-244436	-1.16379e+06	-2.15705e+06	-1.48539e+06	-1.34158e+06	-1.42293e+06	-1.60159e+06	-1.53126e+06	-1.51837e+06	-1.41416e+06	-1.27388e+06	-1.21169e+06
Cocomitant use of Proton Pump Inhibitors	Etodolac	0	0	0	0	0	0	0	0	0	0	0	0	0	464079	840018	748361	673418	592268	508985	454574
	Meloxicam	0	0	0	0	0	0	0	0	0	0	0	0	0	3.36973e+06	6.00362e+06	5.51425e+06	6.0571e+06	4.60878e+06	4.12905e+06	3.3968e+06
	Celecoxib	0	0	0	0	0	0	0	0	0	0	0	0	0	1.41758e+06	2.69863e+06	2.59513e+06	2.4663e+06	2.26202e+06	1.98866e+06	1.81839e+06
	Etoricoxib	0	0	0	0	0	0	0	0	0	0	0	0	0	1.1001e+06	2.47645e+06	2.3677e+06	2.34777e+06	2.18663e+06	1.96972e+06	1.87357e+06
Reduced length of stay (Total days compared to 1999 LOS)	Knee replacement	0	0	0	0	0	0	8.63692e+06	1.53844e+07	2.95485e+07	5.12707e+07	6.67586e+07	8.82957e+07	1.02116e+08	1.29279e+08	1.48397e+08	1.5279e+08	1.79713e+08	2.05844e+08	2.10734e+08	2.25032e+08
	Hip replacement	0	0	0	0	0	0	7.60928e+06	1.89095e+07	3.62092e+07	6.02165e+07	8.31475e+07	1.02244e+08	1.27567e+08	1.69276e+08	1.85531e+08	1.93029e+08	2.11366e+08	2.34739e+08	2.38556e+08	2.46248e+08
	Total	4.50476e+07	4.91195e+07	6.03124e+07	7.1602e+07	8.30127e+07	9.18801e+07	1.17626e+08	1.66161e+08	2.45227e+08	3.29424e+08	4.09083e+08	4.05397e+08	4.4648e+08	5.28682e+08	5.69046e+08	5.78642e+08	6.44278e+08	6.97333e+08	7.1198e+08	7.46424e+08

## Sheet: Table A2.4 LBP 
Table A2.4 - Low Back Pain
Low Back Pain	Population numbers (UK)
Interventions	1994	1995	1996	1997	1998	1999	2000	2001	2002	2003	2004	2005	2006	2007	2008	2009	2010	2011	2012	2013
Structured exercise programmes	13311.8	15354.1	21808.1	28874.6	36118.7	39877.8	45278.5	50645	55387.6	60983.7	68140.2	67411.5	66967.8	67916.7	85742.3	102503	116089	134588	132049	129327
Manual therapy	6655.9	7677.03	10904.1	14437.3	18059.4	19938.9	22639.3	25322.5	27693.8	30491.8	34070.1	33705.8	33483.9	33958.4	60019.6	85419	107797	134588	132049	129327
Combined physical and psychological therapy	798.708	977.077	1453.87	1999.01	2579.91	2924.37	3395.89	3872.86	4307.92	4814.5	5451.22	5392.92	5357.42	5433.34	8402.74	11275.3	13764.8	16823.5	16506.1	16165.9
Low Back Pain	Net Monetary Benefit (UK)
Interventions	1994	1995	1996	1997	1998	1999	2000	2001	2002	2003	2004	2005	2006	2007	2008	2009	2010	2011	2012	2013
Structured exercise programmes	2.90234e+06	3.34761e+06	4.75478e+06	6.29547e+06	7.8749e+06	8.69447e+06	9.87199e+06	1.1042e+07	1.2076e+07	1.32961e+07	1.48565e+07	1.46976e+07	1.46009e+07	1.48078e+07	1.86942e+07	2.23485e+07	2.53107e+07	2.9344e+07	2.87904e+07	2.8197e+07
Manual therapy	4.90352e+06	5.6558e+06	8.03321e+06	1.06362e+07	1.33047e+07	1.46893e+07	1.66787e+07	1.86555e+07	2.04025e+07	2.24639e+07	2.51e+07	2.48316e+07	2.46682e+07	2.50177e+07	4.42175e+07	6.29297e+07	7.94159e+07	9.91534e+07	9.72828e+07	9.52776e+07
Combined physical and psychological therapy	421300	515386	766886	1.05443e+06	1.36084e+06	1.54254e+06	1.79126e+06	2.04284e+06	2.27233e+06	2.53954e+06	2.87539e+06	2.84465e+06	2.82592e+06	2.86596e+06	4.43226e+06	5.94747e+06	7.26065e+06	8.87402e+06	8.70661e+06	8.52715e+06
Total	8.22716e+06	9.5188e+06	1.35549e+07	1.79861e+07	2.25404e+07	2.49263e+07	2.8342e+07	3.17404e+07	3.47509e+07	3.82996e+07	4.28319e+07	4.23739e+07	4.20949e+07	4.26914e+07	6.7344e+07	9.12256e+07	1.11987e+08	1.37371e+08	1.3478e+08	1.32002e+08

## Sheet: Table A2.5 SLE 
Table A2.5 Systemic Lupus Erythematosus
Systemic lupus erythematosus	Population numbers (UK)
Interventions	1994	1995	1996	1997	1998	1999	2000	2001	2002	2003	2004	2005	2006	2007	2008	2009	2010	2011	2012	2013
Mycophenolate mofetil	145.081	181.279	217.449	253.582	289.68	491.205	736.513	1179.15	1624.55	2172.69	2793.45	2714.94	3317.63	4001.03	4628.24	4994.01	5611.85	4332.44	3197.94	3286.05
Systemic lupus erythematosus	Net Monetary Benefit (UK)
Interventions	1994	1995	1996	1997	1998	1999	2000	2001	2002	2003	2004	2005	2006	2007	2008	2009	2010	2011	2012	2013
Mycophenolate mofetil	422426	527825	633139	738347	843450	1.43022e+06	2.14448e+06	3.4333e+06	4.73014e+06	6.32614e+06	8.13359e+06	7.90501e+06	9.65983e+06	1.16497e+07	1.34759e+07	1.45409e+07	1.63398e+07	1.26146e+07	9.31133e+06	9.56789e+06

## Sheet: Table A2.6 Osteoporosis 
Table A2.6 - Osteoporosis
Osteoporosis	Population numbers (UK)
	Intervention	1994	1995	1996	1997	1998	1999	2000	2001	2002	2003	2004	2005	2006	2007	2008	2009	2010	2011	2012	2013
Primary fracture prevention	Alendronate	0	2679.56	2678.5	2396.85	3194.39	3964.96	4489.04	7895.72	15300.6	23497	30661.2	34569.4	39745	49047.8	58669.9	71643	88285.1	90346.3	95043.7	90598.6
	Etidronate	0	0	0	5191.66	5189.35	3668.77	4014.09	3831.23	3113.91	2407.21	1748.91	1298.45	1013.19	766.561	600.575	483.866	376.406	295.961	231.339	93.3003
	Raloxifene	0	0	0	0	302.997	2984.69	1731.48	2453.66	3202.47	4048.91	3738.65	3622.49	3100.79	2692.92	2476	2163.7	1900.57	1655.93	1433.11	1259.74
	Risedronate	0	0	0	0	0	0	1245.4	5746.12	3671.63	7326.12	14382.7	19022	23413.9	22401.3	19878.3	16871.8	14262.2	12469	13324.9	13685.3
	Strontium ranelate	0	0	0	0	0	0	0	0	0	0	10.6649	645.314	1344.6	2008.96	3029.42	3462.26	3804.33	4387.45	4436.64	3592.62
	Teriparatide	0	0	0	0	0	0	0	0	0	0	81.2061	280.154	264.818	329.797	391.805	437.91	453.422	457.354	500.667	516.5
	Zoledronate	0	0	0	0	0	0	0	0	0	0	0	0	0	734.74	1469.14	2203.1	2935.92	3668.25	3875.21	3736.38
	Denosumab	0	0	0	0	0	0	0	0	0	0	0	0	0	0	0	0	88.2271	1435.84	1249.97	2750.6
Secondary fracture prevention	Alendronate	0	3572.75	3571.33	3195.81	4259.18	5286.62	5985.39	10527.6	20400.8	31329.4	40881.5	46092.6	52993.4	65397.1	78226.5	95524	117714	120462	126725	120798
	Etidronate	0	0	0	6922.22	6919.14	4891.7	5352.13	5108.31	4151.88	3209.61	2331.88	1731.27	1350.93	1022.08	800.767	645.155	501.875	394.614	308.452	124.4
	Raloxifene	0	0	0	0	403.995	3979.58	2308.64	3271.55	4269.97	5398.55	4984.87	4829.99	4134.38	3590.56	3301.33	2884.93	2534.09	2207.91	1910.82	1679.65
	Risedronate	0	0	0	0	0	0	1660.54	7661.5	4895.51	9768.16	19176.9	25362.7	31218.5	29868.4	26504.4	22495.7	19016.3	16625.4	17766.5	18247.1
	Strontium ranelate	0	0	0	0	0	0	0	0	0	0	47.6523	2835.71	1792.8	2678.62	4039.23	4616.34	5072.44	5849.94	5915.52	4790.17
	Teriparatide	0	0	0	0	0	0	0	0	0	0	108.275	265.315	353.09	439.729	522.406	583.88	604.562	609.805	667.556	688.667
	Zoledronate	0	0	0	0	0	0	0	0	0	0	0	0	0	979.653	1958.86	2937.47	3914.56	4891	5166.95	4981.84
	Denosumab	0	0	0	0	0	0	0	0	0	0	0	0	0	0	0	0	117.636	1914.45	1666.62	3667.46
Osteoporosis	Net Monetary Benefit (UK)
	Intervention	1994	1995	1996	1997	1998	1999	2000	2001	2002	2003	2004	2005	2006	2007	2008	2009	2010	2011	2012	2013
Primary fracture prevention	Alendronate	0	689062	688789	616363	821452	1.01961e+06	1.15438e+06	2.03042e+06	3.93462e+06	6.04237e+06	7.88466e+06	8.8897e+06	1.02206e+07	1.26129e+07	1.50872e+07	1.84233e+07	2.27029e+07	2.3233e+07	2.44409e+07	2.32979e+07
	Etidronate	0	0	0	-2.5493e+06	-2.54816e+06	-1.8015e+06	-1.97107e+06	-1.88128e+06	-1.52904e+06	-1.18203e+06	-858780	-637587	-497516	-376410	-294905	-237596	-184829	-145328	-113596	-45813.9
	Raloxifene	0	0	0	0	3384.9	33343.2	19343.1	27410.9	35776.2	45232.1	41766	40468.4	34640.2	30083.7	27660.4	24171.6	21232.1	18499.1	16009.9	14073.1
	Risedronate	0	0	0	0	0	0	-14258.9	-65788.7	-42037.3	-83878.4	-164671	-217788	-268071	-256477	-227591	-193169	-163292	-142761	-152560	-156687
	Strontium ranelate	0	0	0	0	0	0	0	0	0	0	-13683.1	-827938	-1.72513e+06	-2.5775e+06	-3.88674e+06	-4.44208e+06	-4.88096e+06	-5.6291e+06	-5.69221e+06	-4.60934e+06
	Teriparatide	0	0	0	0	0	0	0	0	0	0	-371377	-1.28122e+06	-1.21108e+06	-1.50825e+06	-1.79183e+06	-2.00268e+06	-2.07362e+06	-2.0916e+06	-2.28969e+06	-2.36209e+06
	Zoledronate	0	0	0	0	0	0	0	0	0	0	0	0	0	-356349	-712534	-1.0685e+06	-1.42392e+06	-1.7791e+06	-1.87948e+06	-1.81214e+06
	Denosumab	0	0	0	0	0	0	0	0	0	0	0	0	0	0	0	0	-22497.9	-366139	-318742	-701403
Secondary fracture prevention	Alendronate	0	2.35168e+06	2.35075e+06	2.10357e+06	2.80351e+06	3.4798e+06	3.93975e+06	6.92959e+06	1.34284e+07	2.06219e+07	2.69094e+07	3.03394e+07	3.48817e+07	4.30462e+07	5.14909e+07	6.28766e+07	7.74824e+07	7.92913e+07	8.34139e+07	7.95127e+07
	Etidronate	0	0	0	-2.73645e+06	-2.73523e+06	-1.93376e+06	-2.11577e+06	-2.01939e+06	-1.6413e+06	-1.2688e+06	-921826	-684394	-534040	-404043	-316554	-255039	-198398	-155997	-121935	-49177.2
	Raloxifene	0	0	0	0	9221.81	90840.1	52698.2	74678.2	97468.5	123230	113787	110252	94373.6	81959.9	75358	65853	57844.5	50399	43617.3	38340.6
	Risedronate	0	0	0	0	0	0	510693	2.35627e+06	1.5056e+06	3.00417e+06	5.8978e+06	7.80023e+06	9.60118e+06	9.18594e+06	8.15136e+06	6.91848e+06	5.84842e+06	5.11308e+06	5.46405e+06	5.61185e+06
	Strontium ranelate	0	0	0	0	0	0	0	0	0	0	-25636.9	-1.52561e+06	-964529	-1.4411e+06	-2.1731e+06	-2.48359e+06	-2.72897e+06	-3.14727e+06	-3.18255e+06	-2.57711e+06
	Teriparatide	0	0	0	0	0	0	0	0	0	0	-468364	-1.14767e+06	-1.52736e+06	-1.90214e+06	-2.25977e+06	-2.52569e+06	-2.61515e+06	-2.63783e+06	-2.88765e+06	-2.97896e+06
	Zoledronate	0	0	0	0	0	0	0	0	0	0	0	0	0	1.45185e+06	2.90302e+06	4.35333e+06	5.80138e+06	7.24847e+06	7.65742e+06	7.38309e+06
	Denosumab	0	0	0	0	0	0	0	0	0	0	0	0	0	0	0	0	178454	2.90422e+06	2.52827e+06	5.56354e+06
	Total	0	3.04075e+06	3.03954e+06	-2.56581e+06	-1.64583e+06	888334	1.57577e+06	7.45192e+06	1.57895e+07	2.73022e+07	3.80231e+07	4.08579e+07	4.81048e+07	5.75866e+07	6.60725e+07	7.94534e+07	9.7801e+07	1.01764e+08	1.06926e+08	1.06129e+08
