# Supplementary material for: Estimating the returns to United Kingdom publicly funded musculoskeletal disease research in terms of net value of improved health outcomes
Source: Health Res Policy Syst. 2018 Jan 10;16:1. doi: 10.1186/s12961-017-0276-7 (PMC5761203; doi:10.1186/s12961-017-0276-7)
Supplement: Supplementary file 3 — Guideline data. (XLSX 16 kb) [file 12961_2017_276_MOESM3_ESM.xlsx]

## Sheet: A3.1 - Extracted references
Table A3.1 - Extracted references
Guideline	Source	Number of references extracted	Number of references, excluding non-journal sources and duplicates within guidelines	Number of references matched
Hand and wrist orthoses for adults with rheumatological conditions: Practice guideline for occupational therapists (evidence)	BACOT	31	31	26
Hand and wrist orthoses for adults with rheumatological conditions: Practice guideline for occupational therapists (supplement)	BACOT	77	37	21
Occupational therapy for adults undergoing total hip replacement: Practice guideline for occupational therapists (evidence)	BACOT	54	52	31
Occupational therapy for adults undergoing total hip replacement: Practice guideline for occupational therapists (supplement)	BACOT	33	6	4
Guidelines for Pain Management Programmes for adults	BPS	87	64	55
The assessment of pain in older people	BPS	87	83	65
British Society for Rheumatology and IASP Musculoskeletal Pain Taskforce Guidelines for the Integrated Management of Musculoskeletal Pain Symptoms (IMMsPS).	BSR	408	357	316
BSR guidelines on standards of care for persons with rheumatoid arthritis	BSR	1	1	1
Osteoarthritis (NICE CG 177)	NICE	509	476	425
Osteoporosis (NICE CG 146)	NICE	76	72	71
Hip fracture (NICE CG 124)	NICE	352	329	263
Rheumatoid arthritis in adults: management (NICE CG 79)	NICE	407	402	362
Low back pain in adults (NICE CG 88)	NICE	142	138	115
Clinician's Guide to the Prevention and Treatment of Osteoporosis	NOF	105	89	85
Guideline for the diagnosis and management of osteoporosis in postmenopausal women and men from the age of 50 years in the UK	NOGG	7	2	2
Osteoporosis: clinical guideline for prevention and treatment: Executive Summary	NOGG	46	37	36
Vitamin D and Bone Health: A Practical Clinical Guideline for Patient Management	NOS	78	77	67
Administering subcutaneous methotrexate for inflammatory arthritis	RCN	122	68	57
Pain: Complex regional pain syndrome	RCP	123	114	96
Upper limb disorders: Occupational aspects of management 2009	RCP	72	65	53
Management of osteoporosis and the prevention of fragility fractures (SIGN CG 142)	SIGN	372	327	320
Management of chronic pain (SIGN CG 136)	SIGN	189	177	174
Management of early rheumatoid arthritis (SIGN CG 123)	SIGN	108	104	92
Management of hip fracture in older people (SIGN CG 111)	SIGN	154	129	107

## Sheet: A3.2 Knowledge cycle time
Table A3.2 - Knowledge Cycle Time
Guideline	Source	Number of references, excluding non-journal sources and duplicates within guidelines	Earliest cited publication	Latest cited publication	Date of publication of guideline	Average age of cited references (knowledge cycle time) in years
Hand and wrist orthoses for adults with rheumatological conditions: Practice guideline for occupational therapists (evidence)	BACOT	31	2004	2014	2015	5.70968
Hand and wrist orthoses for adults with rheumatological conditions: Practice guideline for occupational therapists (supplement)	BACOT	37	1991	2015	2015	7.81081
Occupational therapy for adults undergoing total hip replacement: Practice guideline for occupational therapists (evidence)	BACOT	52	2001	2012	2012	5.36538
Occupational therapy for adults undergoing total hip replacement: Practice guideline for occupational therapists (supplement)	BACOT	6	2000	2010	2012	5.33333
Guidelines for Pain Management Programmes for adults	BPS	64	1996	2013	2013	6.70312
The assessment of pain in older people	BPS	83	1965	2007	2007	8.81928
British Society for Rheumatology and IASP Musculoskeletal Pain Taskforce Guidelines for the Integrated Management of Musculoskeletal Pain Symptoms (IMMsPS).	BSR	357	1996	2013	2008	6.93277
BSR guidelines on standards of care for persons with rheumatoid arthritis	BSR	1	2005	2005	2005	0
Osteoarthritis (NICE CG 177)	NICE	476	1969	2013	2014	11.46
Osteoporosis (NICE CG 146)	NICE	72	1993	2012	2012	5.86
Hip fracture (NICE CG 124)	NICE	329	1968	2010	2011	11.03
Rheumatoid arthritis in adults: management (NICE CG 79)	NICE	402	1955	2008	2009	8.01
Low back pain in adults (NICE CG 88)	NICE	138	1975	2008	2009	7.76
Clinician's Guide to the Prevention and Treatment of Osteoporosis	NOF	89	1986	2014	2014	7.68539
Guideline for the diagnosis and management of osteoporosis in postmenopausal women and men from the age of 50 years in the UK	NOGG	2	2008	2008	2014	6
Osteoporosis: clinical guideline for prevention and treatment: Executive Summary	NOGG	37	1992	2012	2014	7.59459
Vitamin D and Bone Health: A Practical Clinical Guideline for Patient Management	NOS	77	1968	2013	2013	9.64935
Administering subcutaneous methotrexate for inflammatory arthritis	RCN	68	1997	2013	2013	6.30882
Pain: Complex regional pain syndrome	RCP	114	1979	2012	2012	8.80702
Upper limb disorders: Occupational aspects of management 2009	RCP	65	1974	2008	2009	6.96923
Management of osteoporosis and the prevention of fragility fractures (SIGN CG 142)	SIGN	327	1988	2014	2015	6.93
Management of chronic pain (SIGN CG 136)	SIGN	177	1965	2013	2013	4.45
Management of early rheumatoid arthritis (SIGN CG 123)	SIGN	104	1974	2010	2011	14.05
Management of hip fracture in older people (SIGN CG 111)	SIGN	129	1971	2009	2009	11.3
ALL CITED REFERENCES		3237	1955	2015		9

## Sheet: A3.3 Guideline source acronyms
Table A3.3 - Acronyms of guideline producing organisations
Acronym	Organisation
BACOT	British Association/College of Occupational Therapists
BPS	British Pain Society
BSR	British Society for Rheumatology
NICE	National Institute for Health and Care Excellence
NOF	National Osteoporosis Foundation
NOGG	National Osteoporosis Guideline Group
NOS	National Osteoporosis Society
RCN	Royal College of Nursing
RCP	Royal College of Physicians
SIGN	Scottish Intercollegiate Guidelines Network
